# Supplementary material for: Orientational dynamics of colloidal ribbons self-assembled from microscopic magnetic ellipsoids
Source: Royal Society of Chemistry journal article supplement (doi:10.1039/c5sm02823j), 2016-01-01
Supplement: c5sm02823j1.pdf [file c5sm02823j1.pdf]

Supporting Information for the article:

**Orientalional dynamics of colloidal ribbons self-assembled from microscopic magnetic ellipsoids.**

By Fernando Martinez-Pedrero, Andrejs Cebers and Pietro Tierno

**Supporting Videos.**

**MovieS1**(.WMV): ribbon composed of 5 hematite ellipsoids reorienting perpendicular to the direction of an oscillating field direction. The applied field has amplitude  $H = 1600 \text{ A m}^{-1}$  and angular frequency  $\omega = 314.1 \text{ rad s}^{-1}$ . The video corresponds to Fig.3(a) of the manuscript.

**MovieS2**(.WMV): ribbon composed of 6 hematite ellipsoids and subjected to an external oscillating magnetic field with amplitude  $H = 2780 \text{ A m}^{-1}$  and angular frequency  $\omega = 314.1 \text{ rad s}^{-1}$ . Given the high amplitude of the field, the individual ellipsoids follow synchronously the external field and the ribbon break into pieces rather than reorienting as a whole. The video corresponds to the inset in Fig.3(d) of the manuscript.
